# Supplementary material
Source: PubMed Central journal article supplement (PMC2673282)

Table S1

Crystal structures of allosterically activated PDCs mentioned in this paper

| Species        | Mutation | Ligand                   | Binding at regulatory site   | Dimer orientation within tetramer | Loop flexibility (always for both) | pdb id   | R-free   | Resol. (Å) | Reference            |
|----------------|----------|--------------------------|------------------------------|-----------------------------------|------------------------------------|----------|----------|------------|----------------------|
| <i>Sc</i> PDC  | D28A     | Pyruvate                 | cov. at C221                 | planar, open                      | ordered (all su)                   |          |          |            | this paper           |
| <i>Sc</i> PDC  | E477Q    | Pyruvate                 | cov. at C221                 | planar, open                      | ordered (all su)                   |          |          |            | this paper           |
| <i>K/P</i> PDC | wt       | Methyl acetylphosphonate | cov. at C221                 | planar, open                      | ordered (all su)                   |          |          |            | this paper           |
| <i>Sc</i> PDC  | wt       | Pyruvamide               | non-cov. 10 Å away from C221 | tilted, half site open            | ordered at closed site             | 1QBP     | .287     | 2.4        | Lu et al., 2000      |
| <i>Sc</i> PDC  | wt       | Ketomalonate             | n. d.                        | tilted, half site open            | n. d.                              | no entry | no entry | 3.7        | Furey et al., 1998   |
| <i>K/P</i> PDC | wt       | /                        | /                            | tilted, half site open            | disordered (all su)                | 2G1I     | .214     | 2.3        | Kutter et al., 2006  |
| <i>Sc</i> PDC  | wt       | /                        | /                            | planar, open                      | disordered (all su)                | 1PVD     | n. a.    | 2.3        | Arjunan et al., 1996 |

Table S2

Interaction distances of atoms of the loop regions 104-113 and 288-304 within the functional dimer. Interactions between loop atoms are shown in italic, those between atoms of different loops in bold.

| <b>Subunit</b> | <b>Atom 1</b>      | <b>Atom 2</b>   | <b>Distance (Å)</b> |
|----------------|--------------------|-----------------|---------------------|
| A-A            | I104-N             | N170-OD1        | 3.08                |
|                | <i>I104-O</i>      | <i>Q107-N</i>   | 3.42                |
|                |                    | <i>A108-N</i>   | 2.90                |
|                | <i>S105-N</i>      | <i>S103-O</i>   | 3.20                |
|                | <i>S105-O</i>      | <i>A108-N</i>   | 3.16                |
|                |                    | <i>L109-N</i>   | 3.13                |
|                | A106-N             | S103-O          | 3.13                |
|                | <i>A106-O</i>      | <i>Q110-N</i>   | 3.08                |
|                |                    | <i>L111-N</i>   | 3.19                |
|                | Q107-N             | S103-O          | 3.00                |
|                | Q107-NE2           | P102-O          | 2.86                |
|                | <i>Q107-O</i>      | <i>Q110-NE2</i> | 2.50                |
|                |                    | <i>Q110-N</i>   | 2.91                |
|                |                    | <i>K109-N</i>   | 3.19                |
|                | <i>A108-O</i>      | <i>Q110-N</i>   | 3.47                |
|                | <i>K109(LYS)-O</i> | <i>L111-N</i>   | 3.12                |
|                | Q110-NE2           | G120-O          | 3.47                |
|                | <i>Q110-O</i>      | <i>L112-N</i>   | 3.42                |
|                | <i>L111-O</i>      | <i>L113-N</i>   | 2.85                |
|                | L113-O             | T116-N          | 3.46                |
|                |                    | T116-OG1        | 2.71                |
|                | H114-O             | T116-N          | 3.34                |
|                | L288-N             | D219-OD2        | 2.86                |
|                | L288-O             | S290-N          | 2.92                |
|                |                    | <i>N293-ND2</i> | 2.87                |
|                | <i>S290-OG</i>     | <i>N293-N</i>   | 3.34                |
|                | <i>S290-O</i>      | T294-N          | 3.27                |
|                |                    | <i>T294-OG1</i> | 3.39                |
|                |                    | <i>F292-N</i>   | 3.35                |
|                |                    | <i>N293-N</i>   | 3.15                |
|                | <i>D291-OD2</i>    | <i>F292-N</i>   | 2.74                |
|                | <i>D291-O</i>      | T294-N          | 3.30                |
|                |                    | <i>G295-N</i>   | 3.21                |
|                |                    | <i>S296-N</i>   | 2.75                |
|                |                    | Q552-OE1        | 3.41                |
|                |                    | <i>N293-N</i>   | 3.41                |
|                | <i>F292-O</i>      | T294-N          | 3.30                |
|                | N293-OD1           | P246-N          | 3.48                |
|                |                    | M247-N          | 2.88                |
|                | N293-ND2           | D219-OD2        | 3.31                |
|                |                    | D219-OD1        | 2.88                |
|                | <i>T294-O</i>      | <i>S298-N</i>   | 3.20                |
|                |                    | <i>S298-OG</i>  | 2.89                |
|                | <i>G295-O</i>      | <i>S298-OG</i>  | 3.26                |
|                | S296-N             | Q552-OE1        | 3.41                |
|                | S296-OG            | Q552-NE2        | 2.78                |
|                | <i>S296-O</i>      | <i>S298-N</i>   | 3.51                |
|                | <i>S298-O</i>      | <i>S300-N</i>   | 3.35                |
|                | S300-N             | E277-OE2        | 2.97                |
|                | <i>S300-OG</i>     | <i>K302-NZ</i>  | 3.08                |
|                | <i>S300-O</i>      | <i>K302-NZ</i>  | 2.58                |
|                |                    | <i>K302-N</i>   | 3.37                |

|     |                 |                 |             |
|-----|-----------------|-----------------|-------------|
|     |                 | E277-OE1        | 3.41        |
|     | K302-N          | E277-O          | 3.21        |
|     | K302-NZ         | E277-OE1        | 3.43        |
|     | T303-OG1        | A279-O          | 3.47        |
|     | K304-O          | K306-N          | 2.87        |
| A-B | K109-NZ         | K562-NZ         | 2.85        |
|     | <b>L112-O</b>   | <b>D291-N</b>   | <b>3.01</b> |
|     | <b>H114-N</b>   | <b>D291-OD1</b> | <b>3.05</b> |
|     |                 | <b>D291-OD2</b> | <b>3.17</b> |
|     | <b>H114-ND1</b> | <b>D291-OD1</b> | <b>2.97</b> |
|     | H115-N          | W412-O          | 3.45        |
|     |                 | L411-O          | 2.94        |
|     | H115-ND1        | W412-O          | 2.64        |
|     | H115-NE2        | PYG602-O3       | 3.12        |
|     |                 | PYG602-O1       | 2.86        |

Figure S1

Crystal structures of the loop regions 104-113 and 288-304. Orientation of the structure according to the amino acid sequence given in line 2 of the table. The C $\alpha$ -line is illustrated as tube (white, without pronounced secondary structure, green,  $\beta$ -turn, red,  $\alpha$ -helix), amino acid side chains are presented in ball-and-stick mode (grey, carbon, red, oxygen, blue, nitrogen).

---

| Loop 104-113                                          | Loop 288-304                                                                             |
|-------------------------------------------------------|------------------------------------------------------------------------------------------|
| I104-S105-A106-Q107-A108-<br>K109-Q110-L111-L112-L113 | L288-L289-S290-D291-F292-N293-T294-G295-S296-<br>F297-S298-T299-S300-T301-K302-T303-K304 |

---

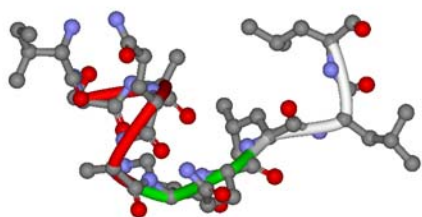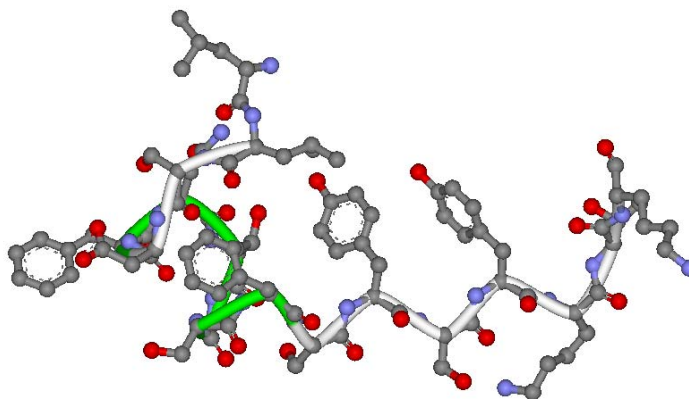

Figure S2

Distances between location of  $C\alpha$ -atoms of one subunit in native *K/PDC* and MAP activated *K/PDC*. Loop regions 104-113 and 288-304 are highlighted in grey.

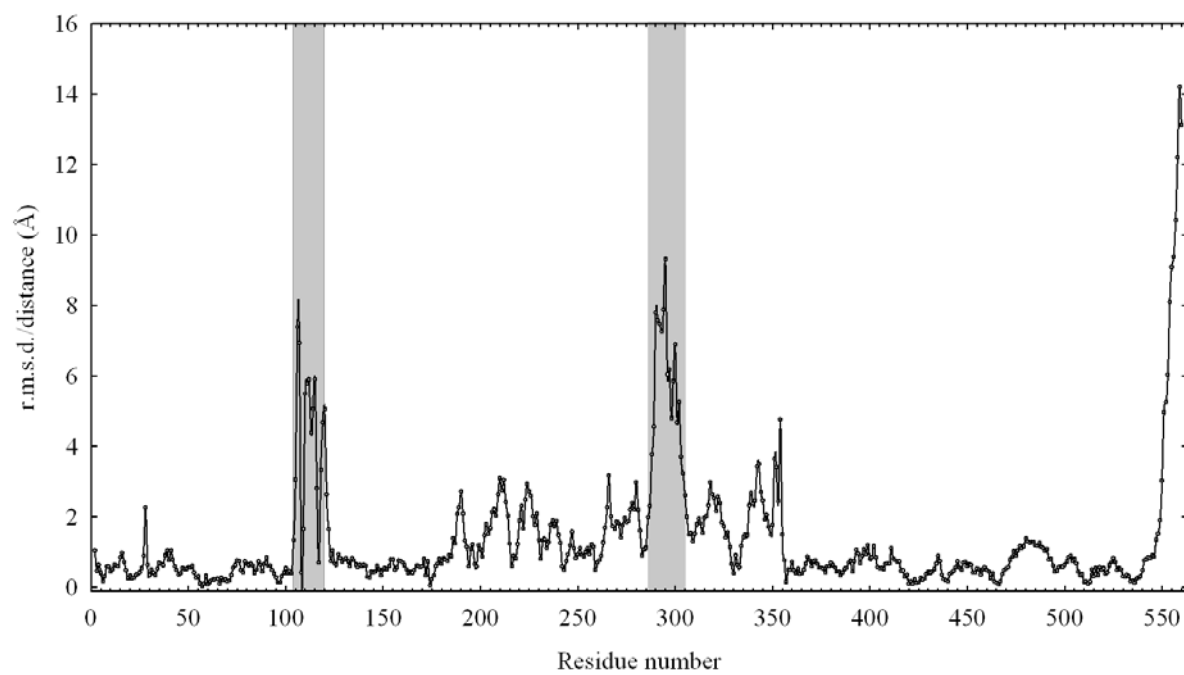

Supplement: M806228200_1.pdf [file M806228200_1.pdf]
